# Supplementary material for: Quality-of-Life Assessment after Head and Neck Oncological Surgery for Advanced-Stage Tumours
Source: MDPI journal article supplement (doi:10.3390/jcm11164875), 2022-08-19
Supplement: s1 [file s1]

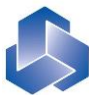

## EORTC QLQ-C30 (version 3)

Ne interesează anumite aspecte despre dvs. și sănătatea dvs. Vă rugăm să răspundeți personal la toate întrebările, încercuind numărul care vi se potrivește cel mai bine. Nu există răspunsuri de tipul „corect” sau „greșit”. Informațiile pe care le furnizați vor rămâne strict confidențiale.

Vă rugăm să completați cu inițialele numelui dvs.:

|  |  |  |  |  |  |
|--|--|--|--|--|--|
|  |  |  |  |  |  |
|--|--|--|--|--|--|

Data nașterii dvs. (ziua, luna, anul):

|  |  |  |  |  |  |  |  |  |  |
|--|--|--|--|--|--|--|--|--|--|
|  |  |  |  |  |  |  |  |  |  |
|--|--|--|--|--|--|--|--|--|--|

Data de astăzi (ziua, luna, anul):

31

|  |  |  |  |  |  |  |  |  |  |
|--|--|--|--|--|--|--|--|--|--|
|  |  |  |  |  |  |  |  |  |  |
|--|--|--|--|--|--|--|--|--|--|

|                                                                                                                         | Deloc | Puțin | Destul de mult | Foarte mult |
|-------------------------------------------------------------------------------------------------------------------------|-------|-------|----------------|-------------|
| 1. Depuneți efort în activitățile mai dificile, cum ar fi căratul unei sacoșe grele de cumpărături, sau al unei valize? | 1     | 2     | 3              | 4           |
| 2. Depuneți efort în a face o plimbare <u>lungă</u> ?                                                                   | 1     | 2     | 3              | 4           |
| 3. Depuneți efort în a face o <u>scurtă</u> plimbare în afara casei?                                                    | 1     | 2     | 3              | 4           |
| 4. Sunteți nevoit(ă) să stați în pat sau pe scaun în timpul zilei?                                                      | 1     | 2     | 3              | 4           |
| 5. Aveți nevoie să fiți ajutat(ă) când mâncați, vă îmbrăcați, vă spălați, sau folosiți toaleta?                         | 1     | 2     | 3              | 4           |

### În cursul săptămânii trecute:

|                                                                                                                          | Deloc | Puțin | Destul de mult | Foarte mult |
|--------------------------------------------------------------------------------------------------------------------------|-------|-------|----------------|-------------|
| 6. Starea dvs de sănătate v-a limitat capacitatea de a vă realiza activitățile profesionale sau alte activități zilnice? | 1     | 2     | 3              | 4           |
| 7. Starea dvs de sănătate v-a limitat capacitatea de a vă ocupa de pasiunile dvs. sau alte activități din timpul liber?  | 1     | 2     | 3              | 4           |
| 8. Ați avut probleme cu respirația?                                                                                      | 1     | 2     | 3              | 4           |
| 9. Ați avut dureri?                                                                                                      | 1     | 2     | 3              | 4           |
| 10. Ați fost nevoit(ă) să vă odihniți?                                                                                   | 1     | 2     | 3              | 4           |
| 11. Ați avut necazuri cu somnul?                                                                                         | 1     | 2     | 3              | 4           |
| 12. V-ați simțit slăbit(ă)?                                                                                              | 1     | 2     | 3              | 4           |
| 13. Ați fost lipsit(ă) de poftă de mâncare?                                                                              | 1     | 2     | 3              | 4           |
| 14. Ați avut senzație de greață?                                                                                         | 1     | 2     | 3              | 4           |
| 15. Ați vomat?                                                                                                           | 1     | 2     | 3              | 4           |
| 16. Ați fost constipat(ă)?                                                                                               | 1     | 2     | 3              | 4           |

Vă rugăm continuați pe pagina următoare.

**În cursul săptămânii trecute:**

|                                                                                                                          | <b>Deloc</b> | <b>Puțin</b> | <b>Destul<br/>de mult</b> | <b>Foarte<br/>mult</b> |
|--------------------------------------------------------------------------------------------------------------------------|--------------|--------------|---------------------------|------------------------|
| 17. Ați avut diaree?                                                                                                     | 1            | 2            | 3                         | 4                      |
| 18. Ați fost obosit(ă)?                                                                                                  | 1            | 2            | 3                         | 4                      |
| 19. A interferat durerea cu activitățile dvs. zilnice?                                                                   | 1            | 2            | 3                         | 4                      |
| 20. Ați avut dificultăți în a vă concentra asupra unor lucruri, cum ar fi cititul ziarului sau vizionarea televizorului? | 1            | 2            | 3                         | 4                      |
| 21. V-ați simțit încordat(ă)?                                                                                            | 1            | 2            | 3                         | 4                      |
| 22. V-ați făcut griji?                                                                                                   | 1            | 2            | 3                         | 4                      |
| 23. V-ați simțit irascibil(ă)?                                                                                           | 1            | 2            | 3                         | 4                      |
| 24. Ați fost deprimat(ă)?                                                                                                | 1            | 2            | 3                         | 4                      |
| 25. Ați avut dificultăți în a vă aminti unele lucruri?                                                                   | 1            | 2            | 3                         | 4                      |
| 26. Starea dvs. fizică sau tratamentul medical pe care îl urmați a interferat cu viața dvs. de <u>familie</u> ?          | 1            | 2            | 3                         | 4                      |
| 27. Starea dvs. fizică sau tratamentul medical pe care îl urmați a interferat cu activitățile dvs. <u>sociale</u> ?      | 1            | 2            | 3                         | 4                      |
| 28. Starea dvs. fizică sau tratamentul medical pe care îl urmați v-a creat greutăți financiare?                          | 1            | 2            | 3                         | 4                      |

**Pentru următoarele întrebări, vă rugăm să încercuiți numărul de la 1 la 7 care vi se potrivește cel mai bine**

29. Cum ați evalua starea dvs. generală de sănătate în cursul săptămânii trecute?

1      2      3      4      5      6      7

Foarte proastă

Excelentă

30. Cum ați evalua calitatea generală a vieții dvs. în cursul săptămânii trecute?

1      2      3      4      5      6      7

Foarte proastă

Excelentă
